# Supplementary material for: Enhancing oxygen reduction reaction durability via coating graphene layers on iron-nitrogen supported carbon nanotubes
Source: Royal Society of Chemistry journal article supplement (doi:10.1039/c6ra13045c), 2016-01-01
Supplement: c6ra13045c1.pdf [file c6ra13045c1.pdf]

## Electronic Supplementary Information

### Enhancing oxygen reduction reaction durability via coating graphene layers on the iron-nitrogen supported carbon nanotubes

Cai-di Liu,<sup>a</sup> Guang-Lan Li,<sup>\*a</sup> Guang-chun Cheng,<sup>a</sup> Ce Hao,<sup>a</sup> Si-mei Chen<sup>a</sup> and Yang-yang Xie<sup>a</sup>

*State Key Laboratory of Fine Chemicals, Dalian University of Technology, Panjin, 124221, Liaoning, China*

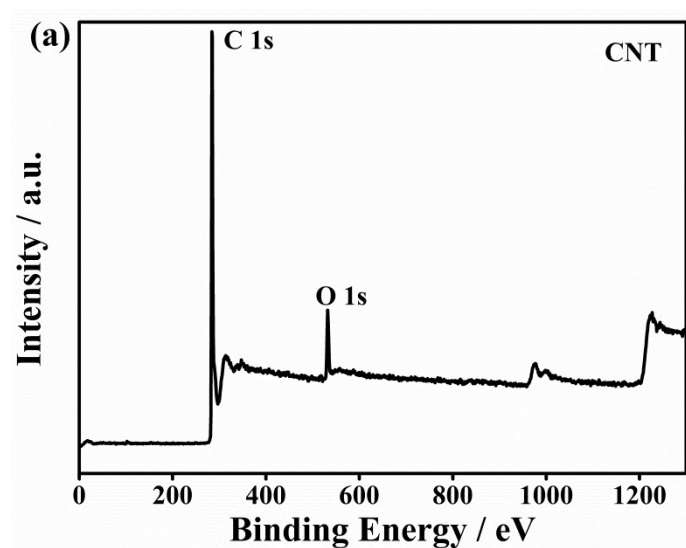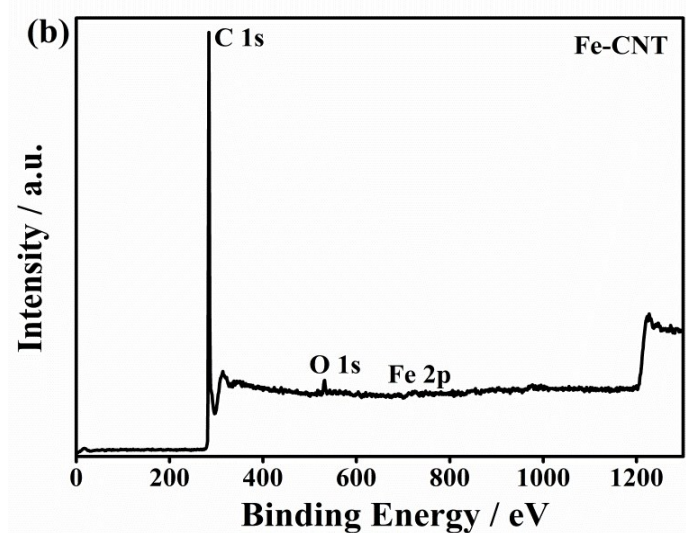

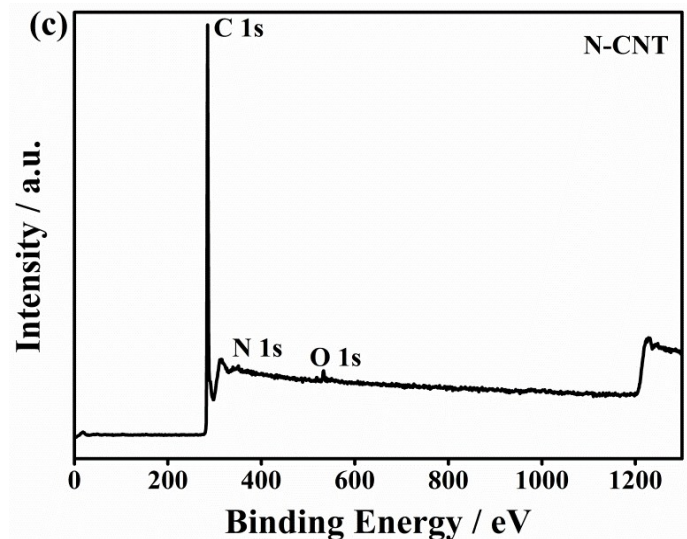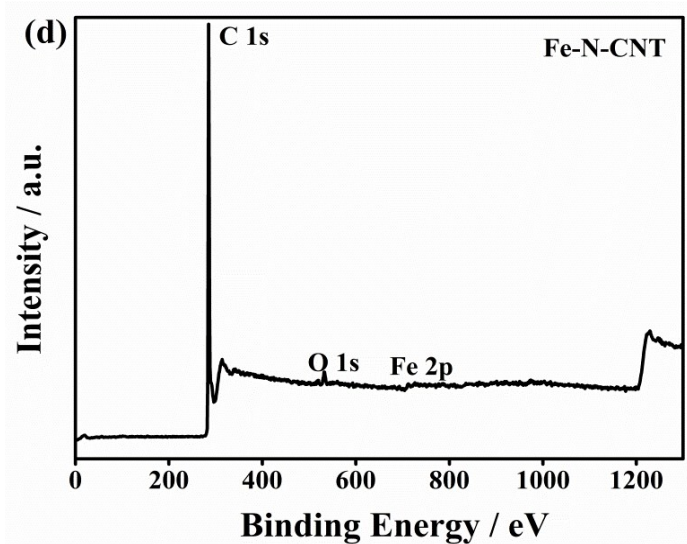

Fig. S1 XPS survey spectrum, (a) CNT, (b) Fe-CNT, (c) N-CNT, (d) Fe-N-CNT.

Table S1 Percentage content of C 1s, O 1s, N 1s, and Fe 2p for Fe-N-CNT@GN calculated from the Fig. S1.

| Samples     | C (at. %) | O (at. %) | N (at. %) | Fe (at. %) |
|-------------|-----------|-----------|-----------|------------|
| CNT         | 93.1      | 6.9       | --        | --         |
| Fe-CNT      | 97.2      | 2.4       | --        | 0.4        |
| N-CNT       | 97.7      | 1.6       | 0.7       | --         |
| Fe-N-CNT    | 96.7      | 2.3       | 0.6       | 0.4        |
| Fe-N-CNT@GN | 97.5      | 1.5       | 0.9       | 0.2        |

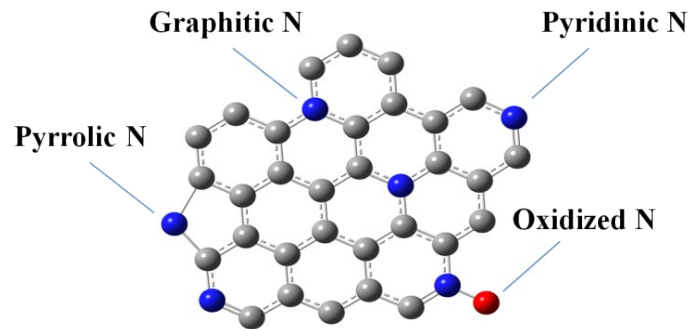

Fig. S2 Types of nitrogen species that can be incorporated into graphitic carbon.

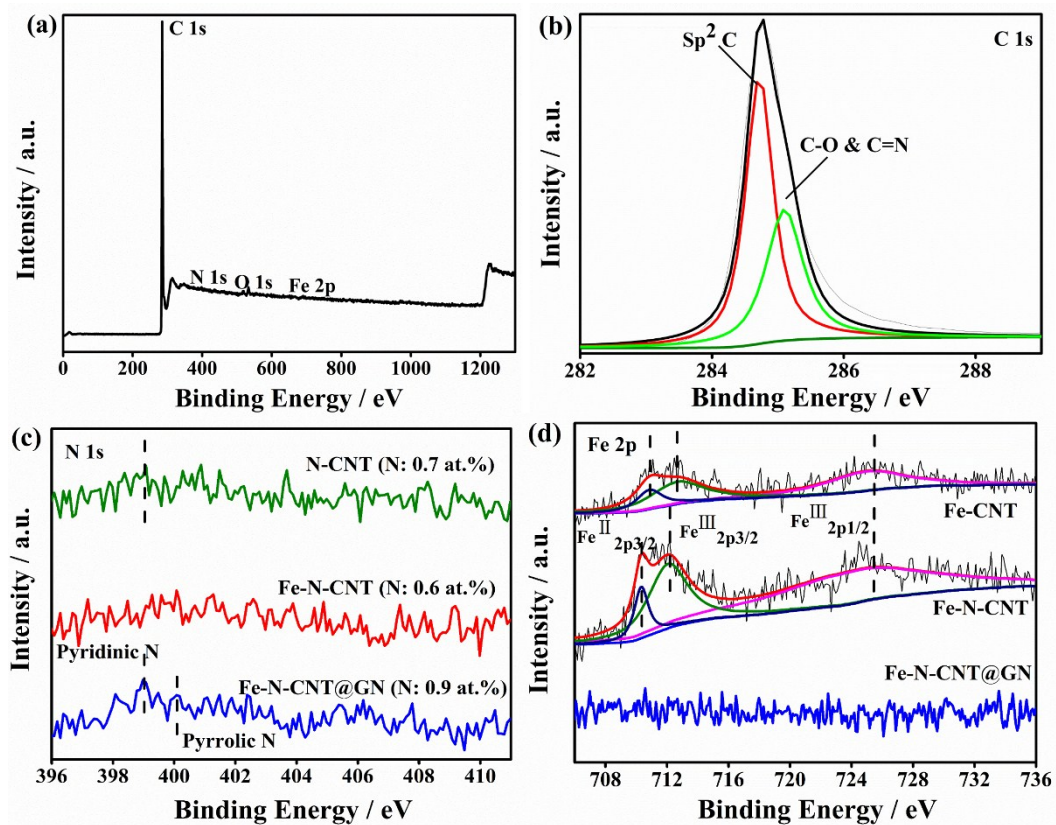

Fig. S3 (a) XPS survey spectrum of Fe-N-CNT@GN, (b) the corresponding high-resolution C 1s spectrum, (c) high-resolution N 1s spectra of N-CNT, Fe-N-CNT and Fe-N-CNT@GN and (d) high-resolution Fe 2p spectra of Fe-CNT, Fe-N-CNT and Fe-N-CNT@GN.

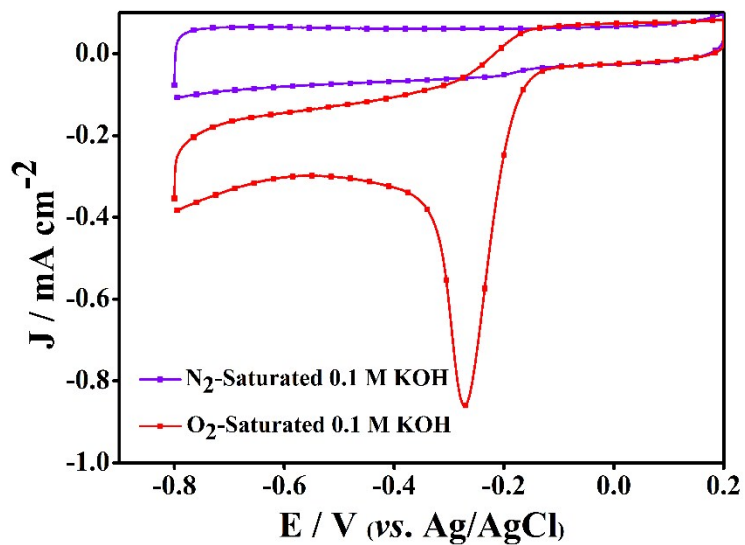

Fig. S4 CV curves of the Fe-N-CNT@GN in  $\text{N}_2$ - and  $\text{O}_2$ -saturated 0.1 M KOH solutions, scan rate:  $10 \text{ mV s}^{-1}$ .

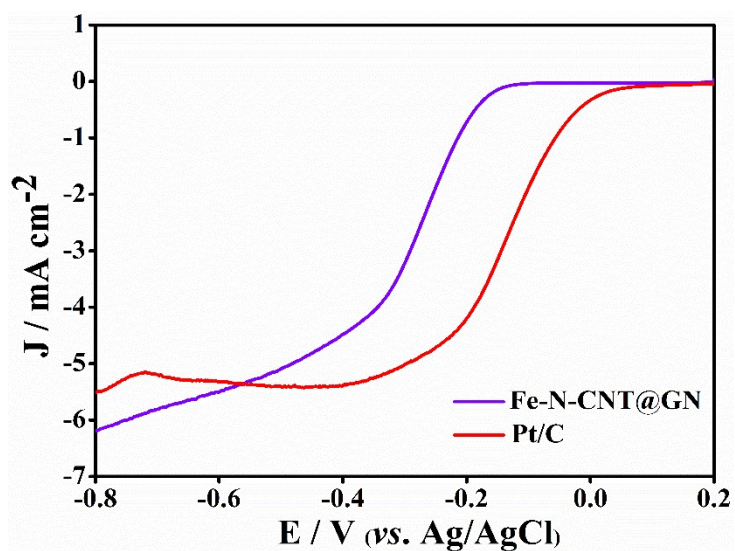

Fig. S5 CV curves of Fe-N-CNT@GN and commercial Pt/C in  $\text{O}_2$ -saturated 0.1 M KOH solution, scan rate:  $10 \text{ mV s}^{-1}$ , rotation rate: 1600 rpm.

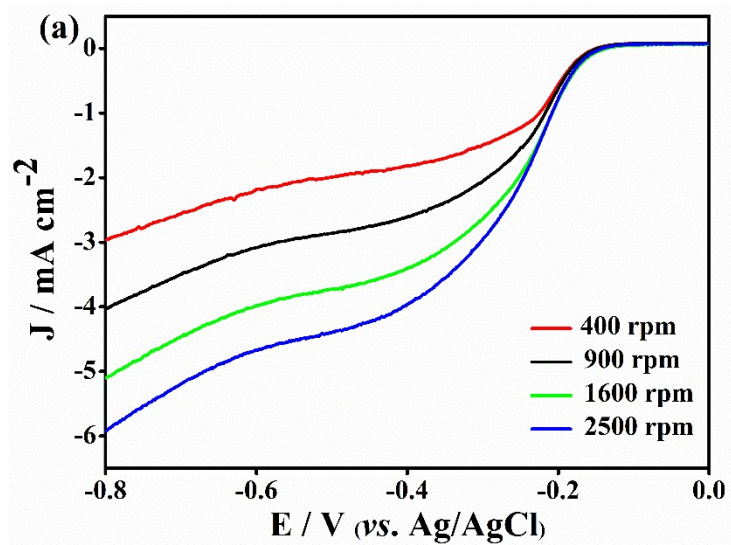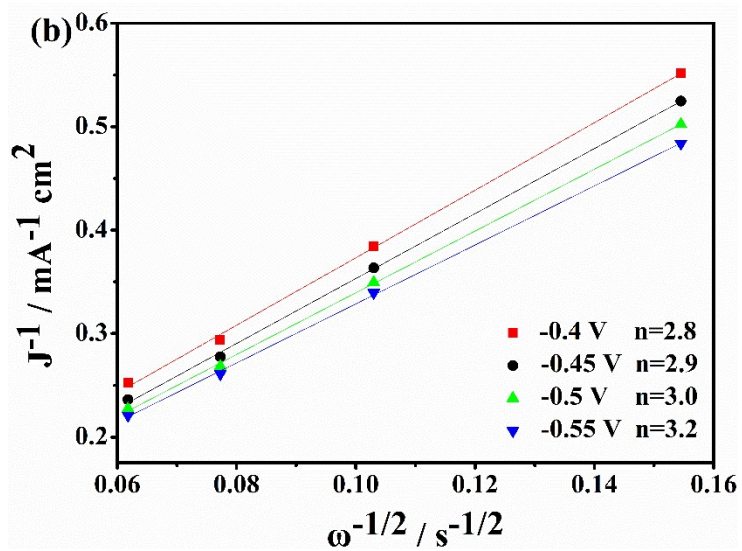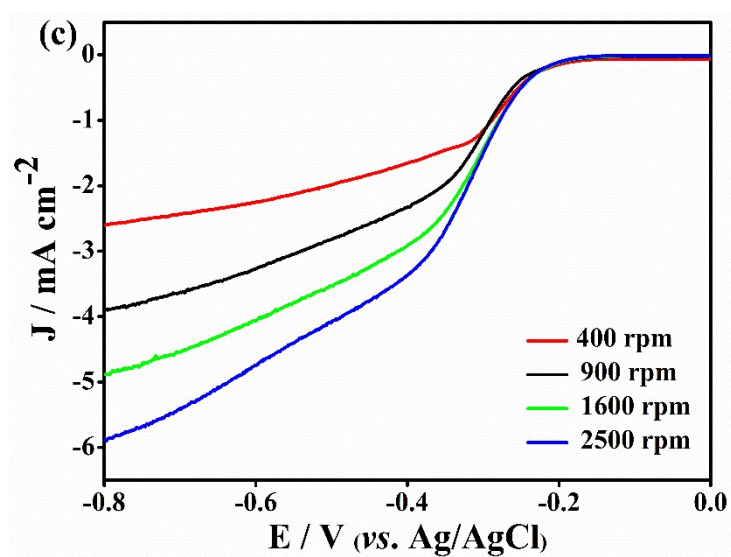

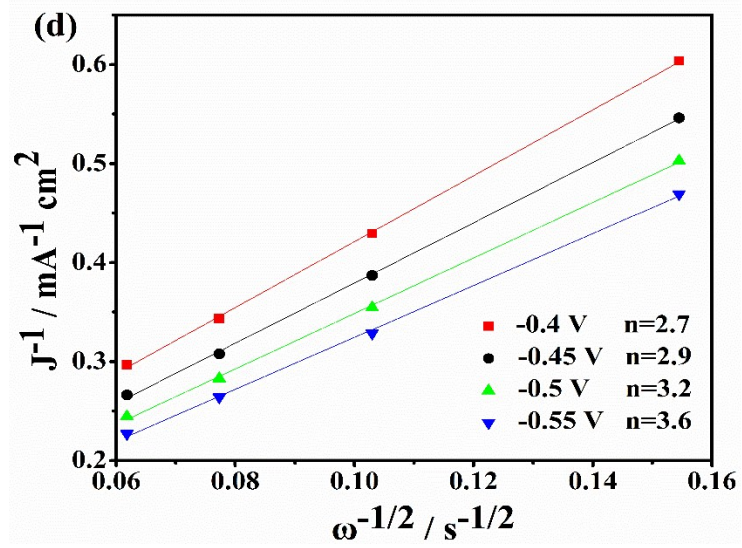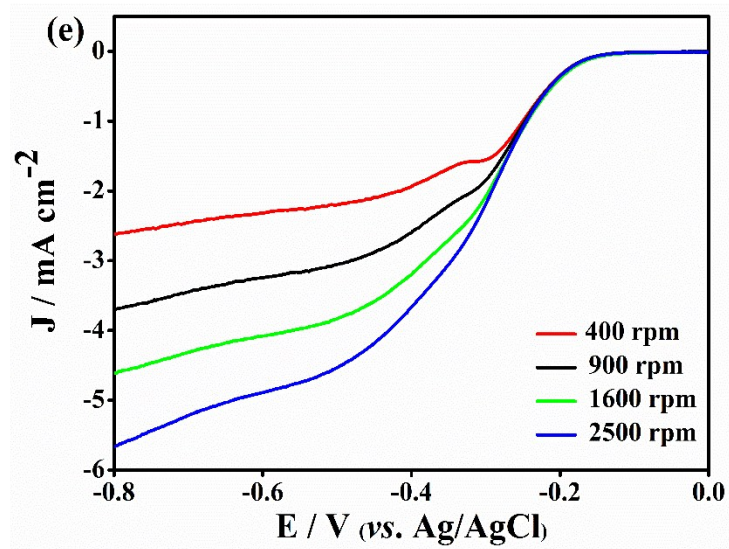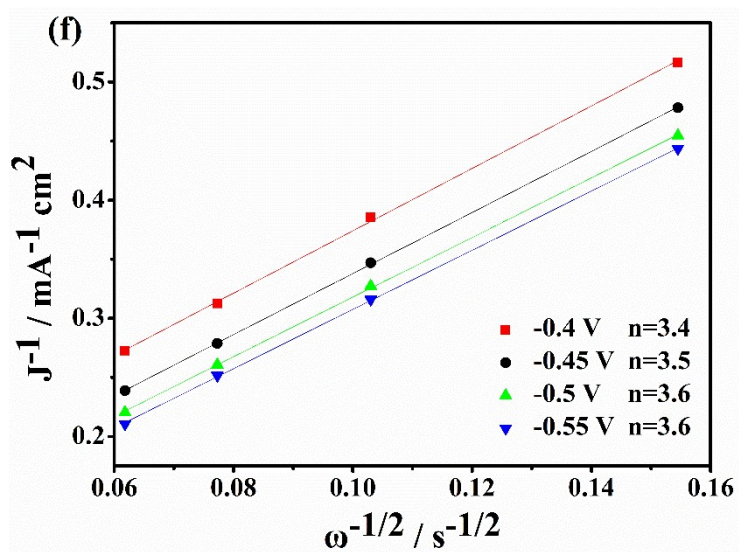

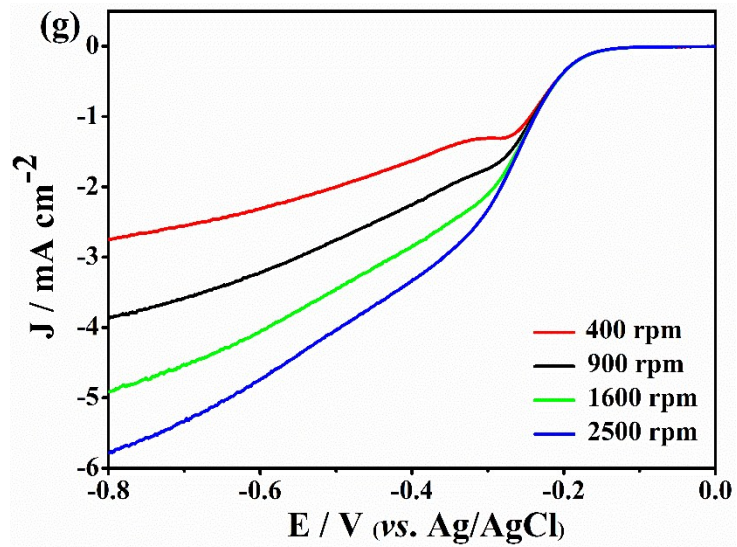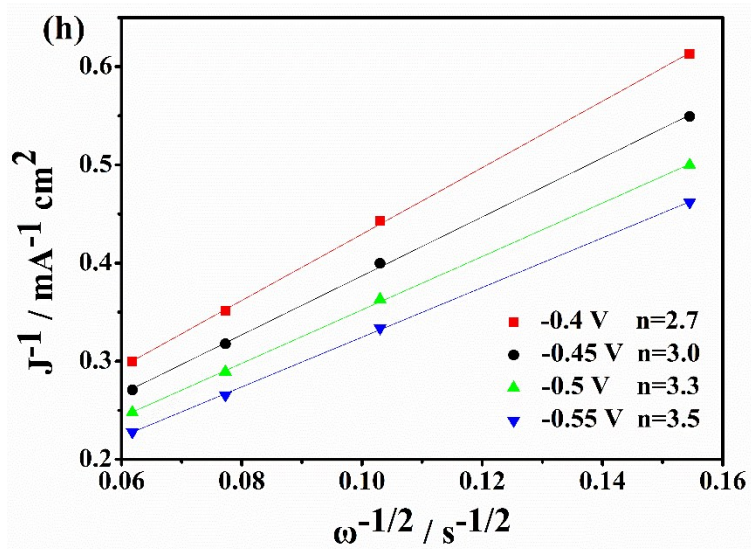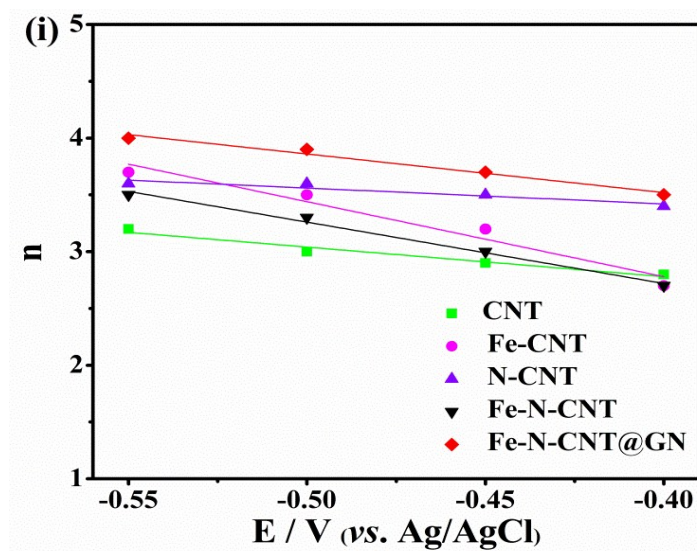

Fig. S6 (a) CV curves of CNT in  $\text{O}_2$ -saturated 0.1 M KOH solution at different rotation rates. (b)

Koutecky-Levich plots of CNT derived from CV curves in (a) at different electrode potentials. (c, d) Fe-CNT, (e, f) N-CNT, (g, h) Fe-N-CNT, (i) the dependence of electron transfer numbers  $n$  on the potential for the CNT, Fe-CNT, N-CNT, Fe-N-CNT, Fe-N-CNT@GN samples.

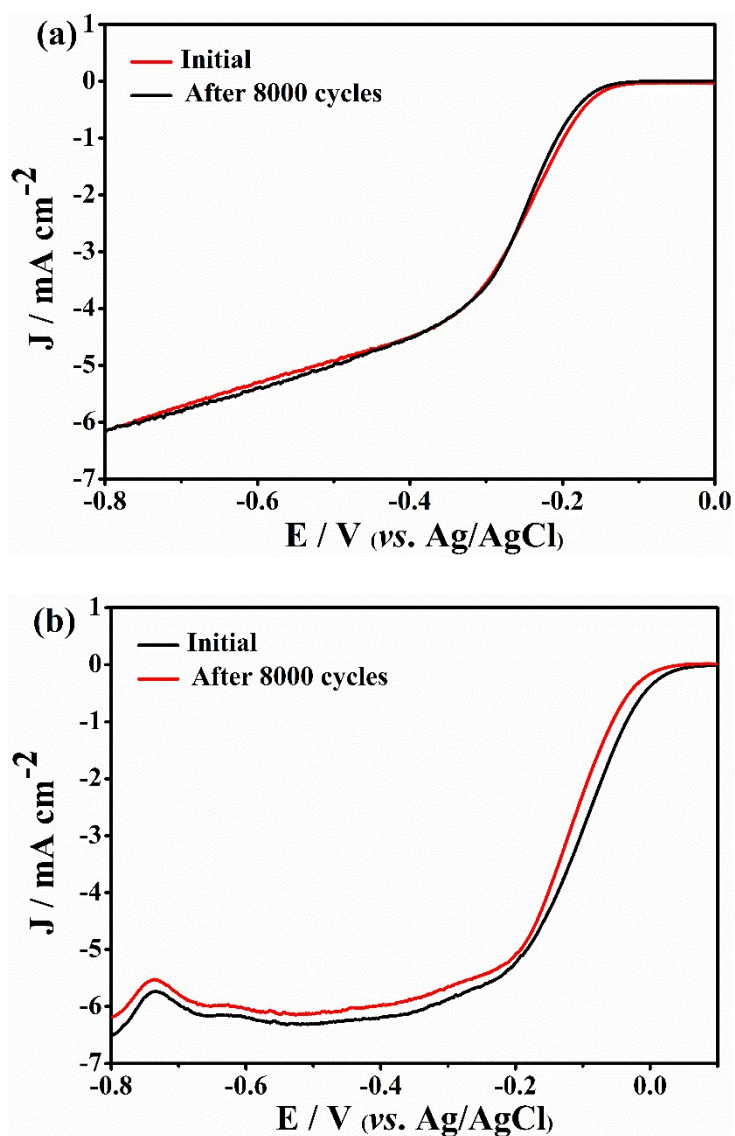

Fig. S7 The stability of Fe-N-CNT@GN (a) and the commercial Pt/C (b) was symbolized by the half-wave potential decay before and after the accelerated aging tests (AATs). The potential cycles were from -0.3 to 0.1 V in a O<sub>2</sub>-saturated 0.1 M KOH solution at 1600 rpm with a scan rate of 100 mV s<sup>-1</sup>.
